# Supplementary material for: Signatures of early frailty in the gut microbiota
Source: PubMed Central journal article supplement (PMC4731918; doi:10.1186/s13073-016-0262-7), 2016-01-29

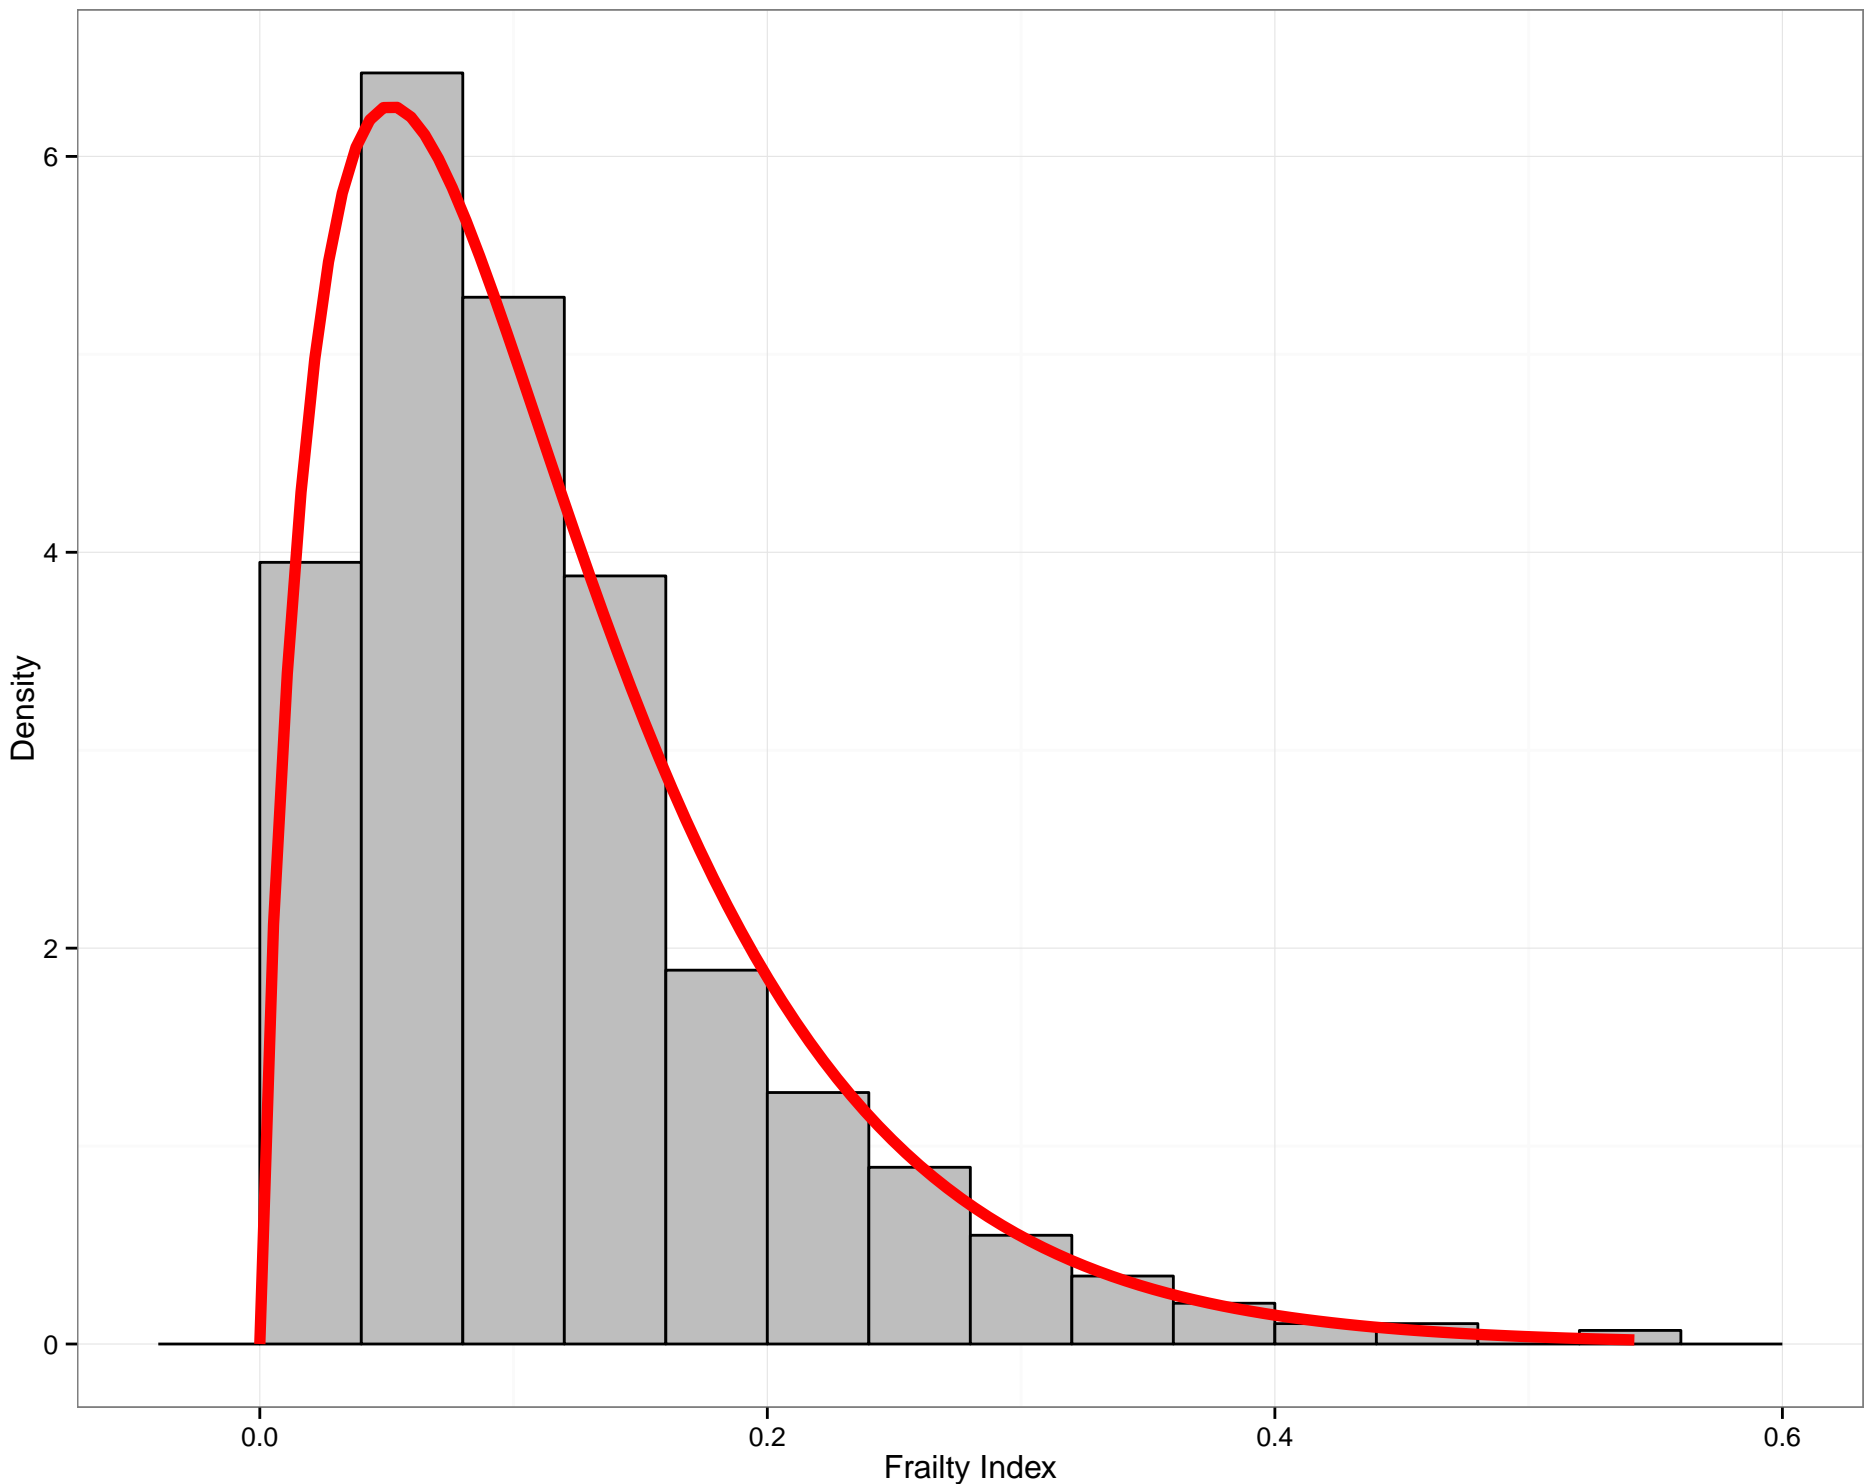

Supplement: 13073_2016_262_MOESM2_ESM.pdf [file 13073_2016_262_MOESM2_ESM.pdf]
